# Supplementary material for: Molecular dynamics simulation of octacosane for phase diagrams and properties via the united-atom scheme
Source: Royal Society of Chemistry journal article supplement (doi:10.1039/d1cp02720d), 2021-01-01
Supplement: d1cp02720d1.pdf [file d1cp02720d1.pdf]

The below tables present the source data for the plots in Figure-4,5,6,8 and 9. All the plotted data were mean values of 200 samples collected at a frequency of one sample every 1 ps of simulation time, and the standard deviations are shown in parentheses.

Table-1S: Tilt angles for plots in Figure-4.

| Temperature (K) | MONO (°)     | ORTHA (°)  | ORTHB (°)   |
|-----------------|--------------|------------|-------------|
| 50              | 32.71 (0.1)  | 0 (0)      | 16.14 (0.1) |
| 100             | 32.30 (0.1)  | 0 (0)      | 15.50 (0.1) |
| 150             | 32.04 (0.1)  | 0 (0)      | 14.52 (0.1) |
| 200             | 31.75 (0.1)  | 0 (0)      | 13.68 (0.1) |
| 250             | 28.25 (0.1)  | 0 (0)      | 0 (0)       |
| 300             | 26.018 (0.1) | 0 (0)      | 0 (0)       |
| 320             | 24.75 (0.1)  | 0 (0)      | 0 (0)       |
| 330             | 10.69 (0.2)  | 6.09 (0.1) | 6.09 (0.1)  |
| 333             | 7.05 (0.2)   | 6.05 (0.1) | 6.05 (0.1)  |

Table-2S: System density for plots in Figure-5.

| Temperature (K) | MONO (g/cm <sup>3</sup> ) | ORTHA (g/cm <sup>3</sup> ) | ORTHB (g/cm <sup>3</sup> ) |
|-----------------|---------------------------|----------------------------|----------------------------|
| 50              | 1037.90 (1.2)             | 1018.32 (0.5)              | 1007.69 (1.1)              |
| 100             | 1034.90 (1.1)             | 1004.64 (0.7)              | 994.81 (1.0)               |
| 150             | 1030.25 (1.1)             | 990.41 (0.7)               | 981.54 (1.1)               |
| 200             | 1025.94 (1.2)             | 975.26 (0.9)               | 964.84 (1.2)               |
| 250             | 986.98 (1.4)              | 956.90 (0.8)               | 957.02 (0.8)               |
| 300             | 942.02 (1.2)              | 940.54 (0.7)               | 940.12 (0.7)               |
| 320             | 925.79 (1.3)              | 922.18 (0.9)               | 922.39 (0.9)               |
| 330             | 905.05 (1.2)              | 908.22 (1.0)               | 908.04 (1.0)               |
| 333             | 902.29 (1.3)              | 902.36 (1.0)               | 902.36 (1.0)               |

Table-3S: Cell dimensions of MONO for plots in Figure-6a.

| Temperature (K) | X (Å)       | Y (Å)       | Z (Å)       | A (°) | β (°)      | γ (°) |
|-----------------|-------------|-------------|-------------|-------|------------|-------|
| 50              | 96.46 (0)   | 41.20 (0)   | 63.56 (0)   | 0 (0) | 15.4 (0.1) | 0 (0) |
| 100             | 96.58 (0)   | 41.28 (0)   | 63.53 (0)   | 0 (0) | 15.2 (0.1) | 0 (0) |
| 150             | 96.70 (0.1) | 41.45 (0)   | 63.49 (0.1) | 0 (0) | 15.0 (0.1) | 0 (0) |
| 200             | 96.48 (0.1) | 42.05 (0)   | 63.61 (0.1) | 0 (0) | 14.7 (0.1) | 0 (0) |
| 250             | 94.82 (0.1) | 44.31 (0)   | 63.86 (0.1) | 0 (0) | 13.9 (0.1) | 0 (0) |
| 300             | 93.66 (0.1) | 46.24 (0.1) | 64.64 (0.1) | 0 (0) | 13.1 (0.1) | 0 (0) |
| 320             | 93.03 (0.2) | 46.16 (0.1) | 64.92 (0.1) | 0 (0) | 12.7 (0.1) | 0 (0) |
| 330             | 85.21 (0.2) | 46.24 (0.1) | 72.41 (0.1) | 0 (0) | 10.7 (0.1) | 0 (0) |
| 333             | 81.09 (0.2) | 46.30 (0.2) | 76.14 (0.1) | 0 (0) | 7.1 (0.1)  | 0 (0) |

Table-4S: Cell dimensions of ORTHA for plots in Figure-6b.

| Temperature (K) | X (Å)       | Y (Å)       | Z (Å)       | $\alpha$ (°) | $\beta$ (°) | $\gamma$ (°) |
|-----------------|-------------|-------------|-------------|--------------|-------------|--------------|
| 50              | 73.29 (0)   | 46.75 (0)   | 74.17 (0)   | 0 (0)        | 0 (0)       | 0 (0)        |
| 100             | 74.00 (0)   | 46.75 (0)   | 74.17 (0)   | 0 (0)        | 0 (0)       | 0 (0)        |
| 150             | 74.61 (0)   | 46.77 (0)   | 74.28 (0)   | 0 (0)        | 0 (0)       | 0 (0)        |
| 200             | 75.49 (0)   | 46.71 (0)   | 74.86 (0)   | 0 (0)        | 0 (0)       | 0 (0)        |
| 250             | 76.31 (0.1) | 46.73 (0)   | 75.47 (0.1) | 0 (0)        | 0 (0)       | 0 (0)        |
| 300             | 77.22 (0.1) | 46.79 (0.1) | 76.54 (0.1) | 0 (0)        | 0 (0)       | 0 (0)        |
| 320             | 78.37 (0.1) | 46.94 (0.1) | 76.79 (0.1) | 0 (0)        | 0 (0)       | 0 (0)        |
| 330             | 80.45 (0.1) | 47.11 (0.1) | 76.53 (0.1) | 0 (0)        | 0 (0)       | 0 (0)        |
| 333             | 80.77 (0.1) | 47.33 (0.1) | 76.17 (0.1) | 0 (0)        | 0 (0)       | 0 (0)        |

Table-5S: Cell dimensions of ORTHB for plots in Figure-6c.

| Temperature (K) | X (Å)       | Y (Å)       | Z (Å)       | $\alpha$ (°) | $\beta$ (°) | $\gamma$ (°) |
|-----------------|-------------|-------------|-------------|--------------|-------------|--------------|
| 50              | 84.93 (0)   | 41.79 (0)   | 72.86 (0)   | 0 (0)        | 0 (0)       | 0 (0)        |
| 100             | 83.54 (0)   | 42.85 (0)   | 73.04 (0)   | 0 (0)        | 0 (0)       | 0 (0)        |
| 150             | 82.83 (0)   | 44.05 (0)   | 73.54 (0)   | 0 (0)        | 0 (0)       | 0 (0)        |
| 200             | 82.17 (0.1) | 44.77 (0)   | 74.00 (0.1) | 0 (0)        | 0 (0)       | 0 (0)        |
| 250             | 78.44 (0.1) | 46.08 (0.1) | 78.02 (0.1) | 0 (0)        | 0 (0)       | 0 (0)        |
| 300             | 78.54 (0.1) | 46.27 (0.1) | 77.20 (0.1) | 0 (0)        | 0 (0)       | 0 (0)        |
| 320             | 78.37 (0.1) | 46.94 (0.1) | 76.79 (0.1) | 0 (0)        | 0 (0)       | 0 (0)        |
| 330             | 80.45 (0.1) | 47.11 (0.1) | 76.53 (0.1) | 0 (0)        | 0 (0)       | 0 (0)        |
| 333             | 80.77 (0.1) | 47.33 (0.1) | 76.17 (0.1) | 0 (0)        | 0 (0)       | 0 (0)        |

Table-6S: Enthalpy and system density of MONO for plots in Figure-8a.

| Temperature (K) | Enthalpy (kJ/mol) | Density (g/cm <sup>3</sup> ) |
|-----------------|-------------------|------------------------------|
| 300             | 4274.8 (62)       | 932.0 (1.2)                  |
| 315             | 5502.4 (56)       | 919.3 (1.2)                  |
| 330             | 6908.9 (77)       | 905.0 (1.2)                  |
| 333             | 7222.6 (75)       | 902.2 (1.3)                  |
| 334             | 8732. 2 (60)      | 887. 9 (1.1)                 |
| 335             | 10178.4 (63)      | 861. 5 (1.3)                 |
| 336             | 12520.3 (74)      | 846. 4 (1.3)                 |
| 340             | 13270.7 (62)      | 841. 4 (1.2)                 |
| 350             | 14434.6 (90)      | 826.3 (1.1)                  |
| 400             | 18762.3 (93)      | 742. 1 (1.2)                 |

Table-7S: Enthalpy and system density of ORTH for plots in Figure-8b.

| Temperature (K) | Enthalpy (kJ/mol) | Density (g/cm <sup>3</sup> ) |
|-----------------|-------------------|------------------------------|
| 300             | 3210.1 (87)       | 928.1 (0.7)                  |
| 315             | 4502.4 (93)       | 919.3 (0.8)                  |
| 330             | 5808.9 (66)       | 901.0 (1.0)                  |
| 333             | 6522.7 (69)       | 897.3 (1.0)                  |
| 334             | 9332.4 (81)       | 875.6 (0.9)                  |
| 335             | 11078.5 (78)      | 851.4 (0.8)                  |
| 336             | 13120.2 (95)      | 830.3 (0.9)                  |
| 340             | 13470.6 (63)      | 826.7 (1.0)                  |
| 350             | 14604.9 (88)      | 814.6 (1.2)                  |
| 400             | 19017.0 (97)      | 742.4 (1.3)                  |

Table-8S: Liquid density for plots in Figure-9.

| Temperature (K) | Experiment (g/cm <sup>3</sup> ) | TraPPE-UA (This work) (g/cm <sup>3</sup> ) | TraPPE-UA (Papavasileiou <sup>1</sup> ) (g/cm <sup>3</sup> ) |
|-----------------|---------------------------------|--------------------------------------------|--------------------------------------------------------------|
| 398.15          | 738.5                           | 745.7 (0.3)                                | 751.8 (0.2)                                                  |
| 423.15          | 721.3                           | 729.3 (0.3)                                | 735.5 (0.4)                                                  |
| 448.15          | 704                             | 712.4 (0.3)                                | 719.1 (0.4)                                                  |
| 473.15          | 686.7                           | 693.1 (0.3)                                | 702.6 (0.5)                                                  |
| 498.15          | 669.6                           | 678.5 (0.4)                                | 686.1 (0.4)                                                  |
| 523.15          | 653                             | 660.8 (0.4)                                | 668.2 (0.6)                                                  |
| 548.15          | 637                             | 644.4 (0.4)                                | 651.3 (0.6)                                                  |
| 573.15          | 622                             | 625.0 (0.5)                                | 633.2 (1.1)                                                  |

1. Papavasileiou KD, Peristeras LD, Bick A, Economou IG. Molecular Dynamics Simulation of Pure n-Alkanes and Their Mixtures at Elevated Temperatures Using Atomistic and Coarse-Grained Force Fields. *J Phys Chem B* 2019; **123**: 6229-43.
